# Supplementary material for: An achromatic neutron lens
Source: Research Square preprint supplement (doi:10.21203/rs.3.rs-8405033/v1), 2026-01-22
Supplement: Supplementary file 2 [file 83f4cfd991a335d1a8b00a9c.pdf]

## 383 Supplementary information

**Supplementary Table.1| X-ray characterisation of the diamond CRL.** At-wavelength speckle-based metrology was used to quantify the phase-profile slopes of a laser-machined diamond CRL used in the achromat at 15, 20 and 25 keV. The average phase-gradient slope extracted from the speckle displacements was used to determine the experimental X-ray focal length  $F_{\text{exp}}$ , which is compared with the theoretical X-ray focal length  $F_{\text{theory}}$  calculated from the corresponding refractive index decrement  $\delta$ . The percentage error remains below 1% across all energies, indicating only minimal deviations from the ideal parabolic profile.

| Energy (keV) | Delta ( $\times 10^{-6}$ ) | Slope of Grad x | Slope of Grad y | Avg slope | $F_{\text{exp}}$ | $F_{\text{theory}}$ | Error (%) |
|--------------|----------------------------|-----------------|-----------------|-----------|------------------|---------------------|-----------|
| 15           | 3.24                       | 0.153           | 0.156           | 0.1545    | 11.65            | 11.57               | 0.7       |
| 20           | 1.82                       | 0.086           | 0.088           | 0.0870    | 20.69            | 20.58               | 0.5       |
| 25           | 1.17                       | 0.055           | 0.056           | 0.0555    | 32.43            | 32.16               | 0.8       |

384 At-wavelength speckle-based metrology technique<sup>54,55</sup> was used to characterise the phase profile errors  
 385 of the diamond compound refractive lens. Characterisation was performed at the Beamline B16, Diamond  
 386 Light Source, Didcot, United Kingdom. In this method, a fine random speckle pattern is placed upstream  
 387 of the lens, and the resulting speckle images are recorded with and without the lens in the beam. By  
 388 tracking the small lateral displacements of the speckles introduced by the lens, the slope of the optical phase  
 389 profile can be determined. In this way, we measured the spatially resolved slope of the phase profile of a  
 390 laser-machined parabolic diamond CRL. The experiment was performed at 15, 20, and 25 keV, and the focal  
 391 length of the lenses at 3 different X-ray energies was determined, and the percentage error is calculated from  
 392 the theoretical focal length at respective energies, shown in Supplementary Table. 1. The very minimal  
 393 error could be due to a potential deviation from the parabolic phase profile due to fabrication errors.
